# Supplementary material for: MFG-E8–mediated uptake of apoptotic cells by APCs links the pro- and antiinflammatory activities of GM-CSF
Source: JCI journal article supplement (doi:10.1172/jci30966), 2007-06-07
Supplement: sd1 [file 1]

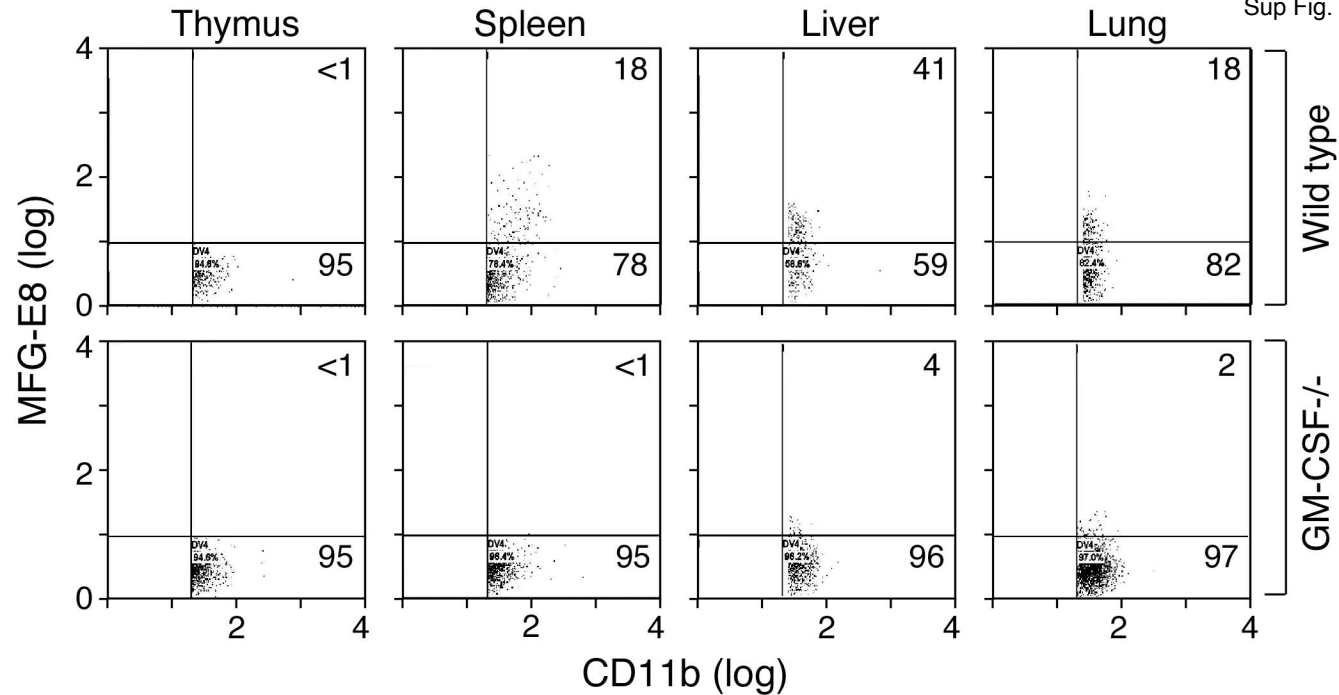

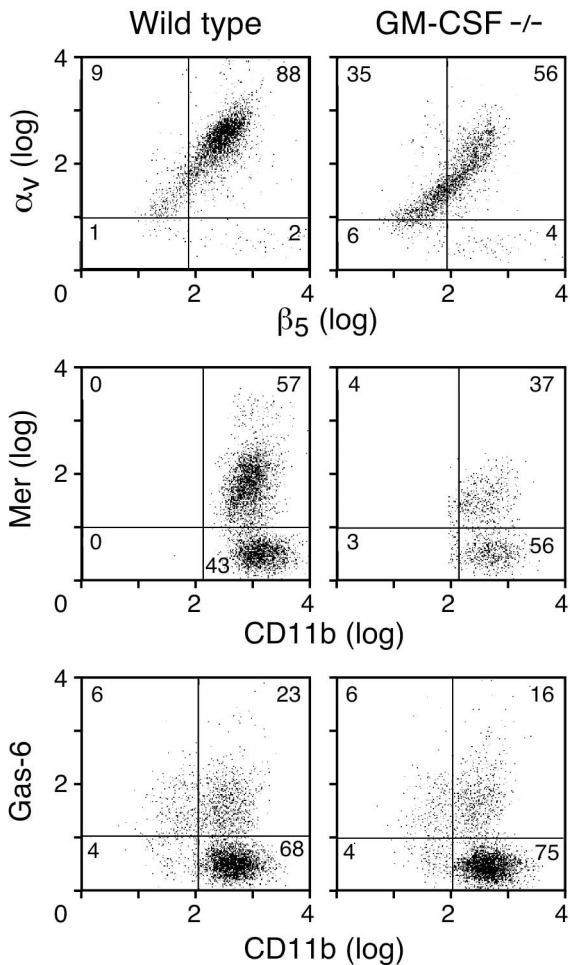

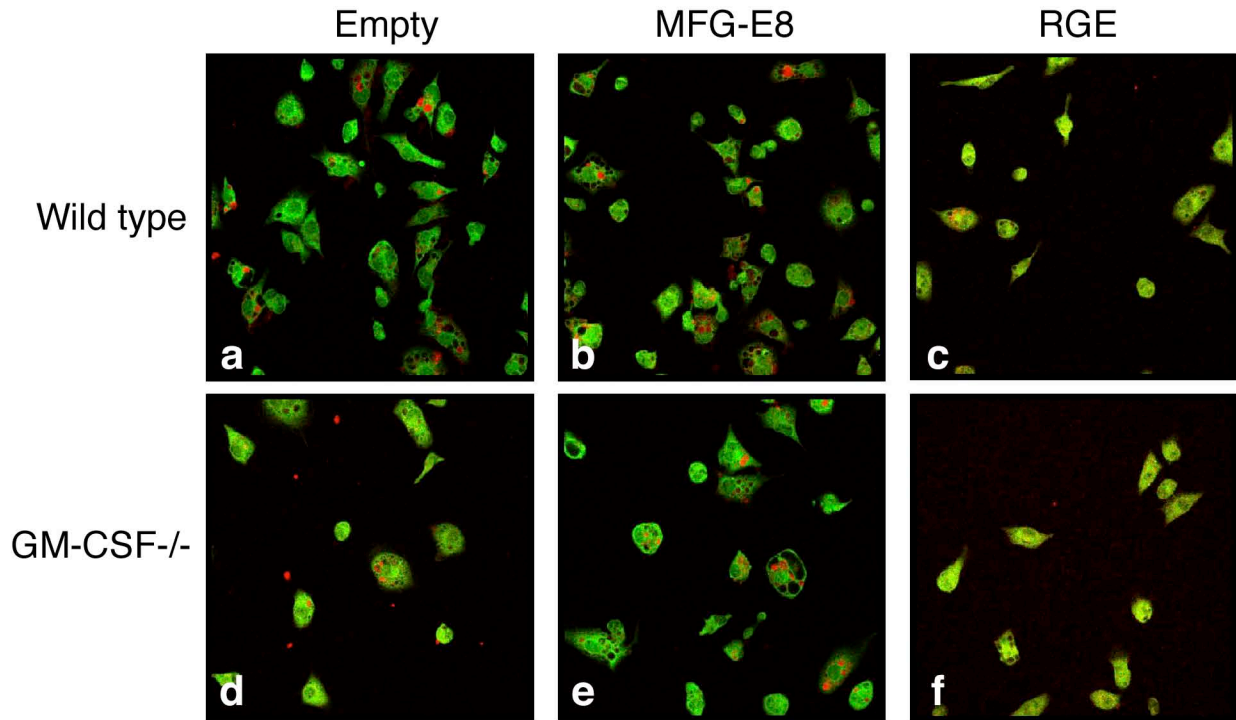

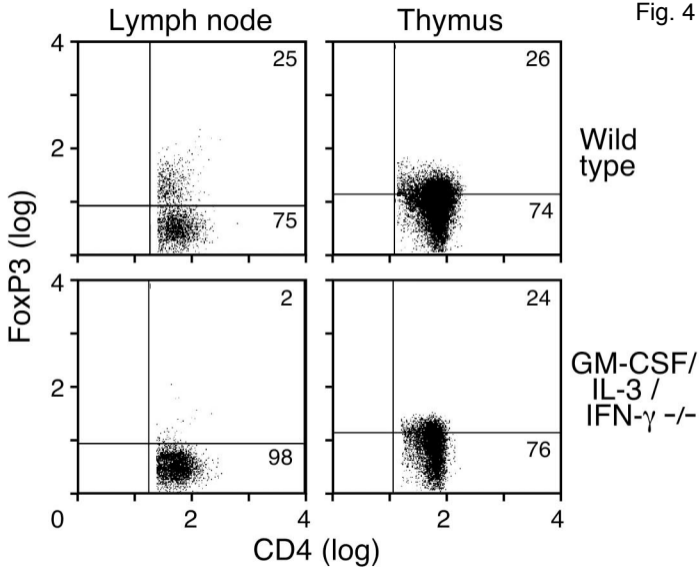

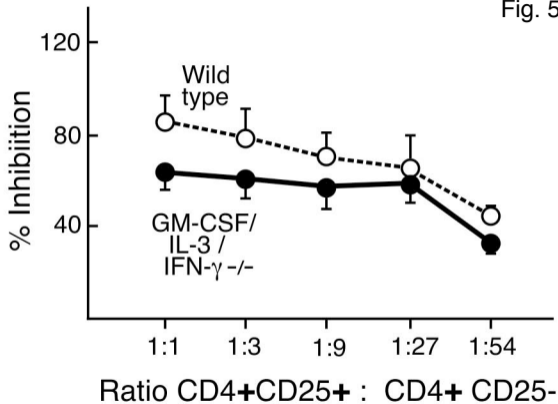

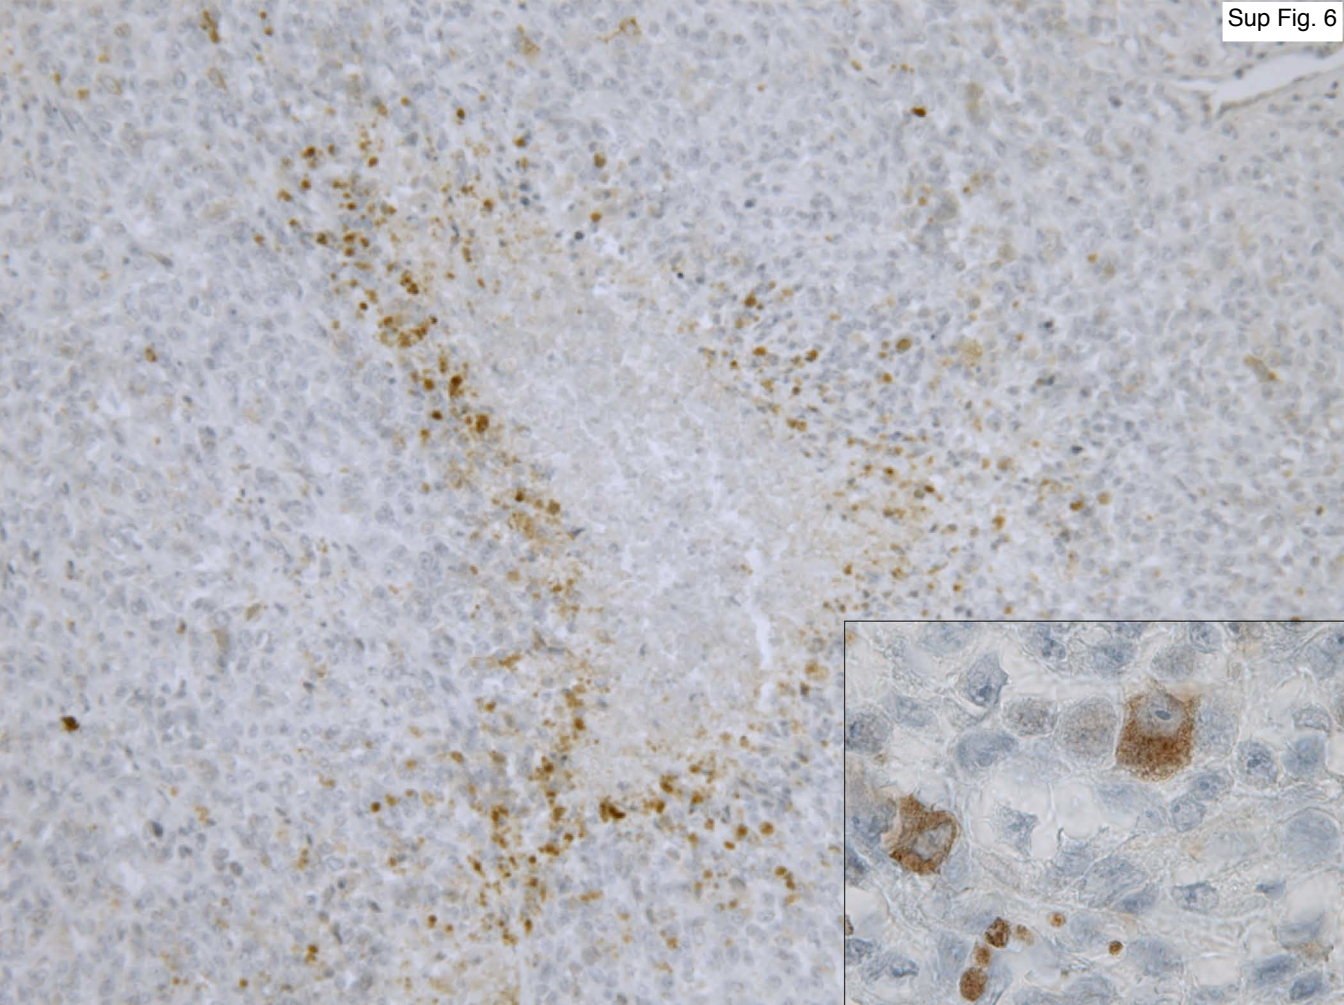

**Supplemental Figure 1.** GM-CSF regulates MFG-E8 expression in macrophages from multiple tissues. Macrophages from thymus, spleen, liver, and lung were purified, and MFG-E8 expression was determined by flow cytometry.

**Supplemental Figure 2.** GM-CSF deficient macrophages show reduced expression of multiple gene products involved in phosphatidylserine-mediated uptake of apoptotic cells. Similar results were found in two experiments.

**Supplemental Figure 3.** MFG-E8 regulates ingestion of apoptotic cells by macrophages in a GM-CSF dependent fashion. Green fluorescent-labeled peritoneal macrophages were co-cultured with red fluorescence-labeled apoptotic wild type thymocytes (dexamethasone treated). The engulfment of apoptotic cells was visualized with fluorescence microscopy, magnification X 200.

**Supplemental Figure 4.** GM-CSF regulates peripheral homeostasis of Tregs. Lymph nodes and thymi were analyzed for FoxP3 expressing CD4<sup>+</sup> T cells. Similar results were obtained in two experiments.

**Supplemental Figure 5.** GM-CSF deficient CD4<sup>+</sup>CD25<sup>+</sup> cells show reduced suppressor activity. Purified splenic CD4<sup>+</sup>CD25<sup>+</sup> T cells were assayed for suppression of anti-CD3 stimulated CD4<sup>+</sup>CD25<sup>-</sup> T cell proliferation. Similar results were obtained in three experiments.

**Supplemental Figure 6.** MFG-E8 is expressed in tumor-associated macrophages in human melanomas. Original magnification X 100, insert X 250.
